# Supplementary material
Source: publisher figshare collection journal article supplement (https://acs.figshare.com/ndownloader/files/25550348)
Supplement: Supplementary file 1 [file 25550348]

# Supporting Information

## **Improved Eco-Friendly Photovoltaics Based on Stabilized AgBiS<sub>2</sub> Nanocrystal Inks**

*Sung Yong Bae,<sup>a,b</sup> Jae Taek Oh,<sup>b</sup> Jin Young Park,<sup>c</sup> Su Ryong Ha,<sup>b</sup> Jongmin Choi,<sup>c</sup> Hyosung Choi<sup>b,\*</sup> and Younghoon Kim<sup>a,\*</sup>*

<sup>a</sup>Division of Energy Technology, Daegu Gyeongbuk Institute of Science and Technology (DGIST), 333 Techno Jungang-daero, Hyeonpung-myeon, Dalseong-gun, Daegu 42988, Republic of Korea

<sup>b</sup>Department of Chemistry and Research Institute for Convergence of Basic Sciences, Hanyang University, 222 Wangsimni-ro, Seongdong-gu, Seoul 04763, Republic of Korea

<sup>c</sup>Department of Energy Science and Engineering, Daegu Gyeongbuk Institute of Science and Technology (DGIST), 333 Techno Jungang-daero, Hyeonpung-myeon, Dalseong-gun, Daegu 42988, Republic of Korea

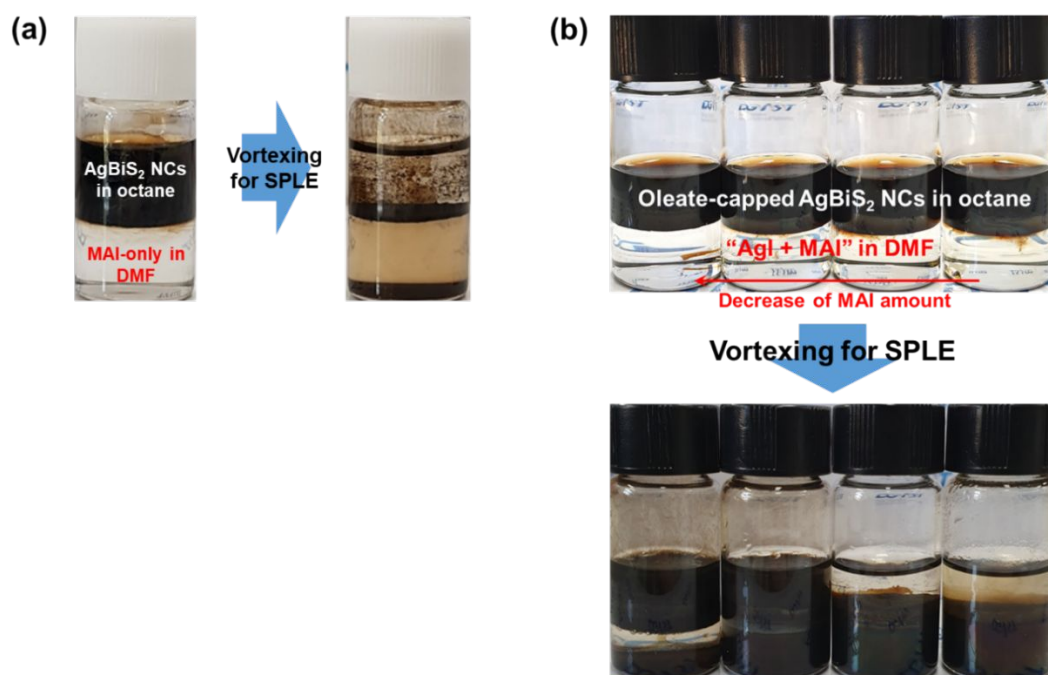

**Figure S1.** (a) Photo images of AgBiS<sub>2</sub> NCs before and after SPLE process using MAI-only DMF solution. (b) Photo images of AgBiS<sub>2</sub> NCs before and after SPLE process using AgI and MAI mixtures with different molar ratios in DMF (AgI:MAI = 1:0.2, 1:0.6, 1:0.8, 1:1).

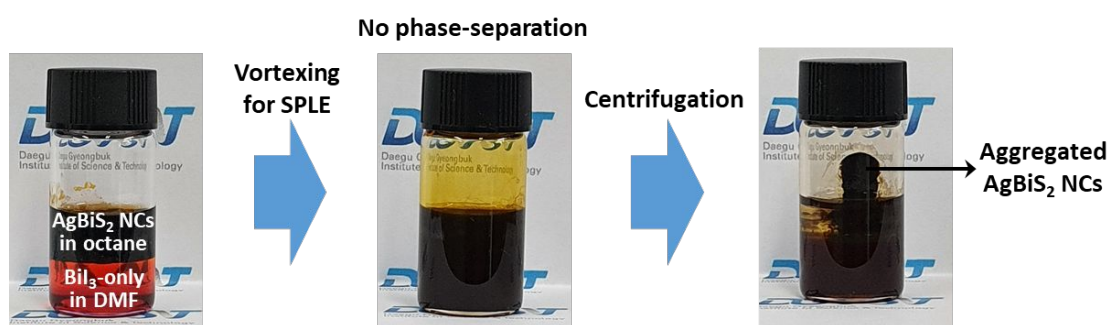

**Figure S2.** Photographs of the AgBiS<sub>2</sub> NCs before and after performing SPLE using a DMF solution of BiI<sub>3</sub> ligand only and in the absence of MAI.

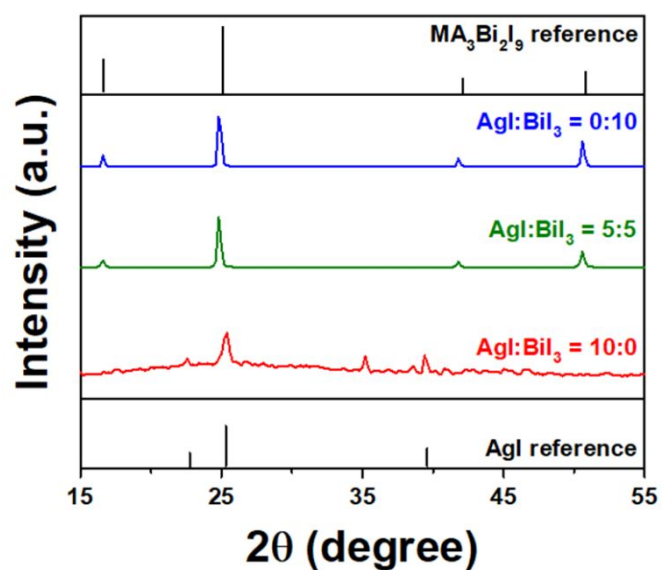

**Figure S3.** Thin film XRD spectra of the resultant films, spin-coated the halometallate ligand solutions with the molar ratios of AgI:BiI<sub>3</sub> to 10:0, 5:5 and 0:10 onto glass substrates and additionally annealed at 150 °C for 10 min under N<sub>2</sub>-filled glove box. The reference XRD patterns for MA<sub>3</sub>Bi<sub>2</sub>I<sub>9</sub> and AgI were obtained from PDF Card No. 01-084-8254 and No. 01-078-0641, respectively.

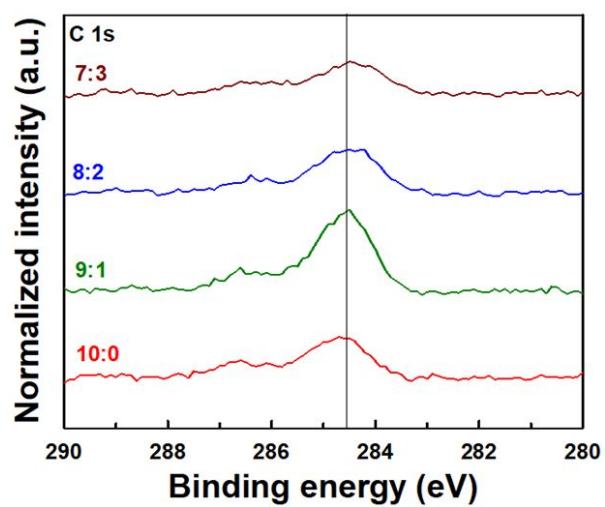

**Figure S4.** Normalized XPS C1s spectra of SPLE-induced AgBiS<sub>2</sub> NC solids using the different molar ratios of AgI to BiI<sub>3</sub>.

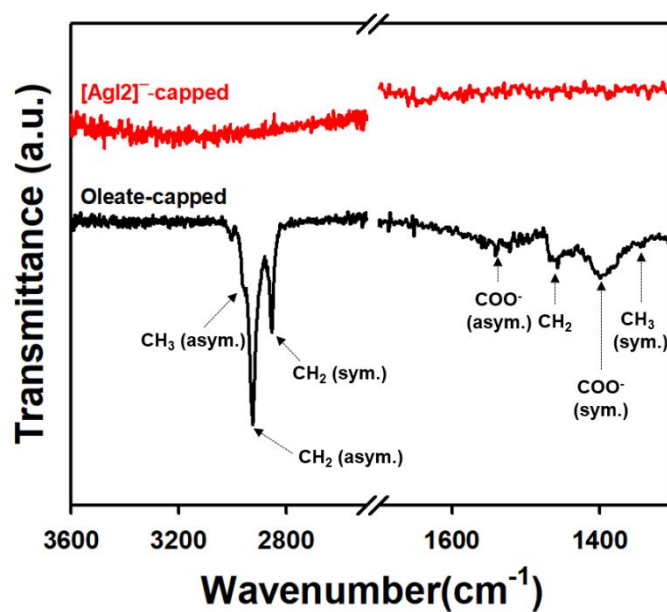

**Figure S5.** FT-IR spectra of the oleate-capped AgBiS<sub>2</sub> NCs before and after performing the SPLE process using a 10:0 (AgI:BiI<sub>3</sub>) solution. The intensities of the peaks attributed to the C–H (2940, 2920, 2850 and 1450 cm<sup>-1</sup>) and COO<sup>-</sup> bonds (1580, 1380 cm<sup>-1</sup>) significantly decreased in the spectrum of the [AgI<sub>2</sub>]<sup>-</sup>-capped AgBiS<sub>2</sub> NCs because of the successful replacement of long-chain oleate ligands with short-chain [AgI<sub>2</sub>]<sup>-</sup> ions.

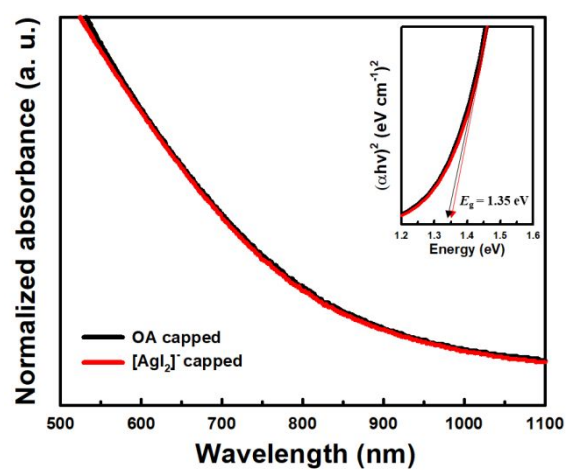

**Figure S6.** Absorbance spectra of as-cast and SPLE-prepared AgBiS<sub>2</sub> NCs using AgI-based halometallates. Inset graph shows the Tauc plots of each AgBiS<sub>2</sub> NC.

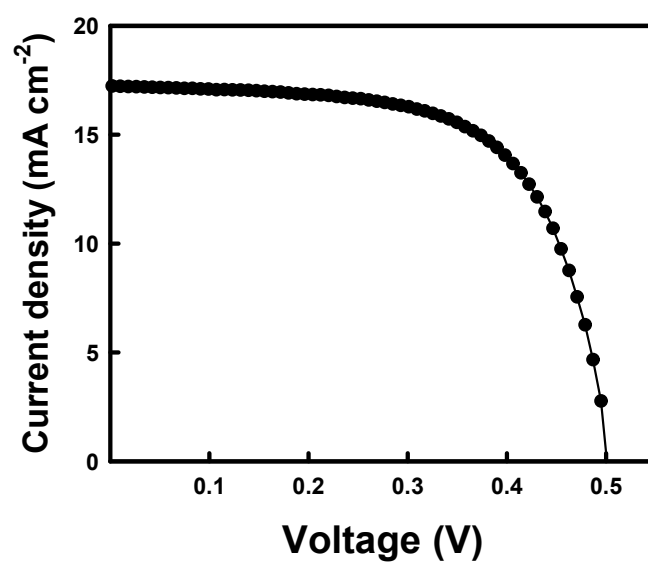

**Figure S7.** The  $J$ - $V$  Curve of AgBiS<sub>2</sub> NC solar cell composed of SSLE-prepared AgBiS<sub>2</sub> NCs using TMAI ligand solutions.



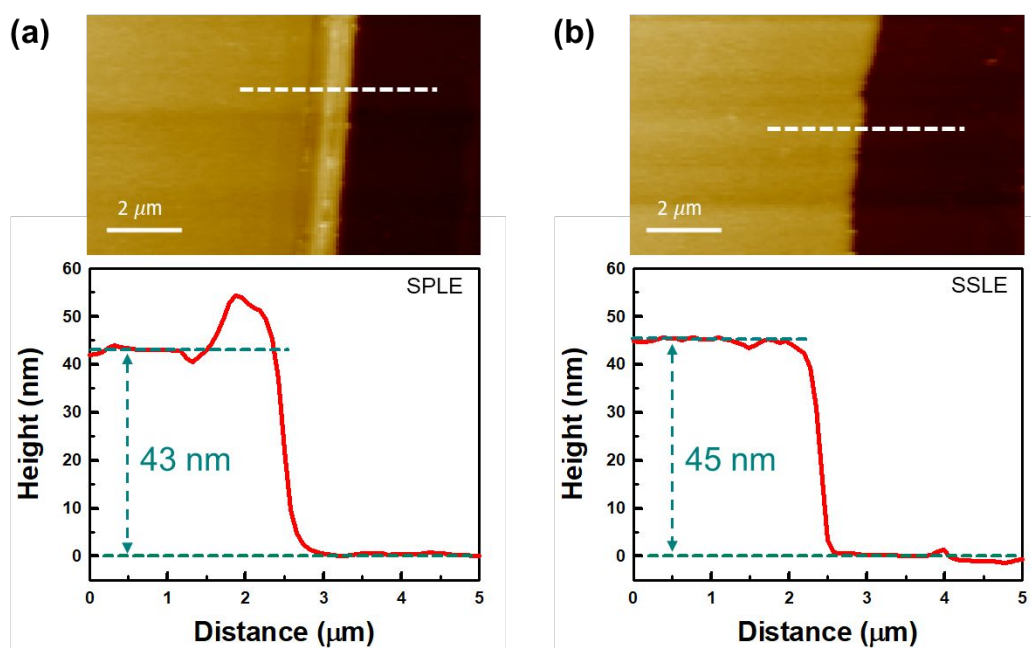

**Figure S8.** AFM images of (a) SPLE-prepared and (b) SSLE-prepared AgBiS<sub>2</sub> NC solids. The height profiles of each solid are measured along the marked white lines and indicates the film thickness.

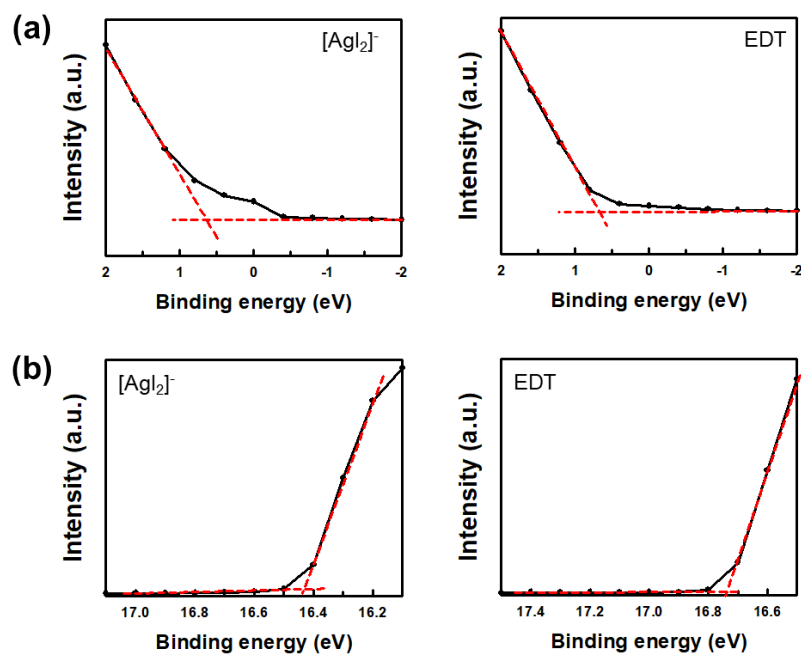

**Figure S9.** UPS spectra of SPLE-prepared AgBiS<sub>2</sub> NCs using AgI-based halometallates and SSLE-prepared AgBiS<sub>2</sub> NCs using EDT in (a) low binding-energy region and (b) high binding-energy region.

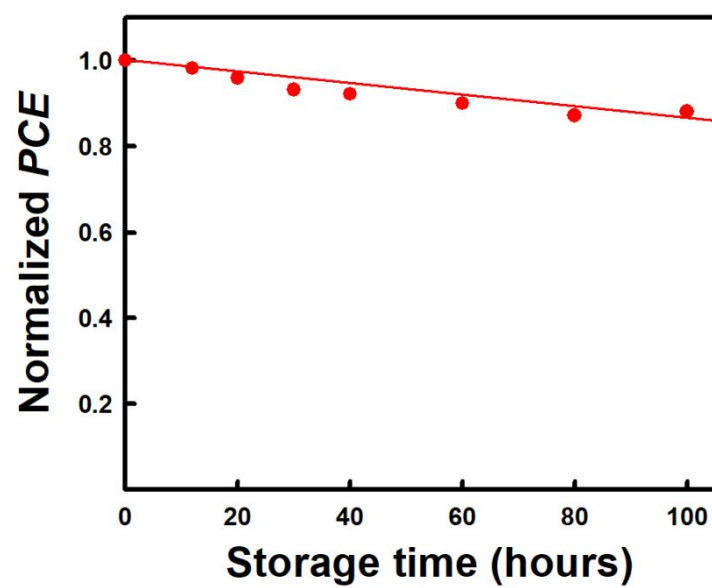

**Figure S10.** Device stability of the AgBiS<sub>2</sub> NC solar cell containing EDT-exchanged AgBiS<sub>2</sub> NC solids stored under dark ambient conditions.

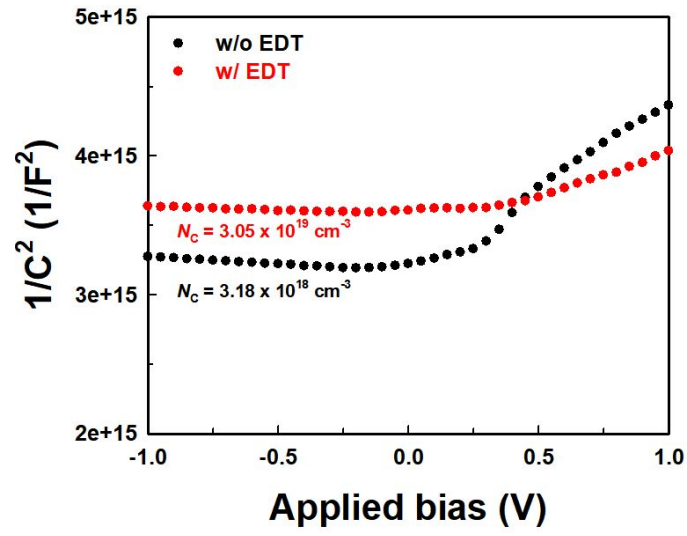

**Figure S11.** Mott-Schottky plots for the calculation of the carrier density of AgBiS<sub>2</sub> NCs prepared using AgI-based halometallates with and without EDT-exchanged AgBiS<sub>2</sub> NCs. The carrier density values were obtained from the Mott-Schottky plot following equation. (A is area, 0.09 cm<sup>2</sup>)

$$\frac{1}{C^2} = \frac{2(V_{bi} - V)}{A^2 e \epsilon_{AgBiS_2} \epsilon_0 N_{AgBiS_2}}$$

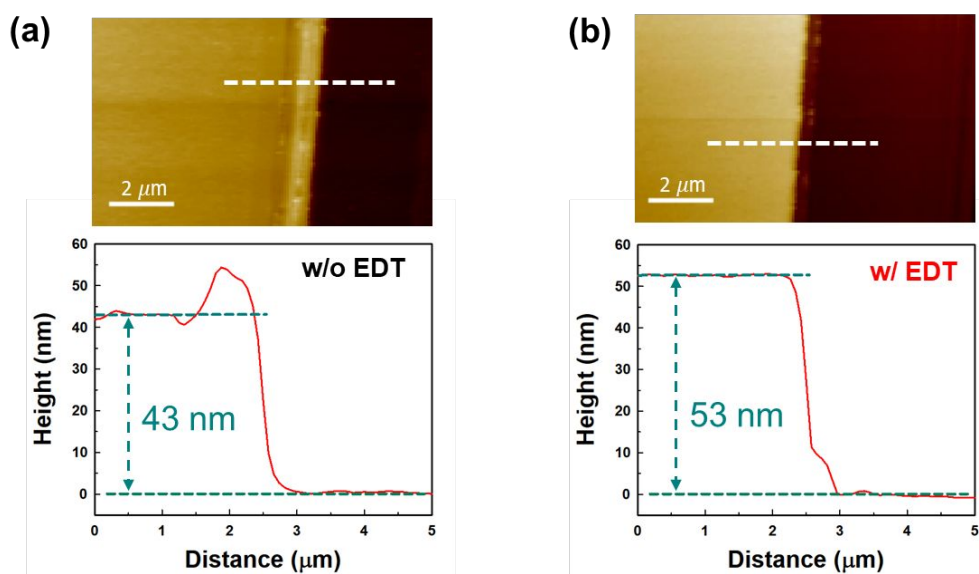

**Figure S12.** AFM images of the [AgI<sub>2</sub>]<sup>-</sup>-capped AgBiS<sub>2</sub> NC solids (a) without and (b) with EDT-exchanged AgBiS<sub>2</sub> NC solid. The height profiles of each solid are measured along the marked white lines and indicates the film thickness.

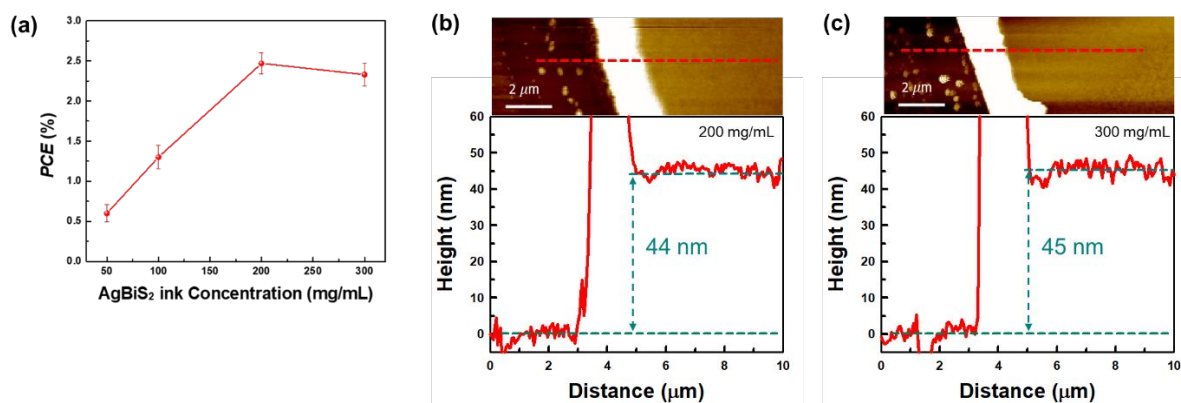

**Figure S13.** (a) Device performance of the AgBiS<sub>2</sub> NC solar cells based on various [AgI<sub>2</sub>]<sup>-</sup>-capped AgBiS<sub>2</sub> NC solids prepared using different ink concentrations. The AFM images of the [AgI<sub>2</sub>]<sup>-</sup>-capped AgBiS<sub>2</sub> NC solids prepared using NC concentrations of (b) 200 mg mL<sup>-1</sup> and (c) 300 mg mL<sup>-1</sup>. The height profile of each solid (measured along the marked white lines) indicates the film thickness.

**Table S1.** Photovoltaic parameters of the AgBiS<sub>2</sub> NC solar cells based on [AgI<sub>2</sub>]<sup>-</sup>-capped AgBiS<sub>2</sub> NC solids prepared using different ink concentrations.

| [AgI <sub>2</sub> ] <sup>-</sup> -capped AgBiS <sub>2</sub> NC<br>Ink concentration (mg mL <sup>-1</sup> ) | $V_{OC}$ (V) | $J_{SC}$ (mA cm <sup>-2</sup> ) | $FF$ | $PCE$ (%) |
|------------------------------------------------------------------------------------------------------------|--------------|---------------------------------|------|-----------|
| 50                                                                                                         | 0.25         | 6.19                            | 0.38 | 0.60      |
| 100                                                                                                        | 0.32         | 10.01                           | 0.41 | 1.30      |
| 200                                                                                                        | 0.47         | 11.88                           | 0.45 | 2.47      |
| 300                                                                                                        | 0.49         | 8.96                            | 0.53 | 2.33      |
